# Supplementary material for: Mapping proteins to disease terminologies: from UniProt to MeSH
Source: PubMed Central journal article supplement (PMC2367626; doi:10.1186/1471-2105-9-s5-s3), 2008-04-29
Supplement: 1471-2105-9-S5-S3-S3.pdf [file 1471-2105-9-S5-S3-S3.pdf]

Regular Expressions used to extract the disease names from the Swiss-Prot disease comment lines

| <b>(1) Starter expressions</b>                                                                                                                                                                                                                                                                                                                                                                                                                                                                                      | <b>(2) Specific stop words</b>                                                                                                                                           | <b>(3) Termination term</b>                                                            |
|---------------------------------------------------------------------------------------------------------------------------------------------------------------------------------------------------------------------------------------------------------------------------------------------------------------------------------------------------------------------------------------------------------------------------------------------------------------------------------------------------------------------|--------------------------------------------------------------------------------------------------------------------------------------------------------------------------|----------------------------------------------------------------------------------------|
| Cause(s) of /a<br>involved in<br>(can) contribute(s) to<br>associated/association with<br>correlated with<br>responsible for<br>contributor to<br>result(s)/resulting in<br>lead(s) to<br>induce(s)<br>defective in<br>individual(s) with<br>patient(s) with/suffering from<br>reduce(s)<br>influence(s)<br>deleted in<br>down-regulated in<br>found in<br>implicated in<br>predispose(s) to<br>favor<br>antigen of<br>antigen for<br>thought to be an<br>role in<br>could impart<br>mediate(s)<br>candidate (gene) | susceptibility to<br>development of<br>genetic predisposition for<br>developing<br>pathogenesis of<br>subset of<br>various types of<br>some form of<br>increased risk of | also known as<br>but<br>which<br>an<br>due to<br>in condition(s) such as<br>.<br>[MIM: |

(1) Expressions used to extract the part of the string containing the disease name. (2) Terms removed from the string extracted. (3) Expressions indicating the end of the disease name.
